# Supplementary material for: Development of an Optimized Drying Process for the Recovery of Bioactive Compounds from the Autumn Fruits of Berberis vulgaris L. and Crataegus monogyna Jacq
Source: MDPI journal article supplement (doi:10.3390/antiox10101579), 2021-10-07
Supplement: s1 [file s1]

## Supplementary Materials

**Supplementary Table S1:** Cytotoxic, anti-inflammatory, and inhibitory activity against fungal and mammalian  $\alpha$ -glucosidase of optimized extracts.

|                                                                                | <i>B. vulgaris</i> | <i>C. monogyna</i> |
|--------------------------------------------------------------------------------|--------------------|--------------------|
| <b>Cytotoxic activity</b> <sup>1</sup> (GI <sub>50</sub> ; $\mu$ g/mL)         |                    |                    |
| NCI H460 (non-small cell lung cancer)                                          | >400               | >400               |
| MCF-7 (breast carcinoma)                                                       | >400               | >400               |
| HepG2 (hepatocellular carcinoma)                                               | >400               | >400               |
| HeLa (cervical carcinoma)                                                      | >400               | >400               |
| PLP2 (porcine liver primary culture)                                           | >400               | >400               |
| <b>Anti-inflammatory activity</b> <sup>2</sup> (IC <sub>50</sub> ; $\mu$ g/mL) |                    |                    |
| NOS production                                                                 | >400               | >400               |

<sup>1</sup> GI<sub>50</sub> values for ellipticine 1.03  $\pm$  0.09  $\mu$ g/mL (NCI-H460), 0.91  $\pm$  0.04  $\mu$ g/mL (MCF-7), 1.1  $\pm$  0.2  $\mu$ g/mL (HepG2), 1.91  $\pm$  0.06  $\mu$ g/mL (HeLa), and 3.2  $\pm$  0.7  $\mu$ g/mL (PLP2); <sup>2</sup> IC<sub>50</sub> Dexamethaxone: 16  $\pm$  1  $\mu$ g/mL (NOS). Different letters in the same row mean significant differences ( $p < 0.05$ ).
